# Supplementary material
Source: publisher site journal article supplement (https://www.spandidos-publications.com/4501/downloadSupplementary)
Supplement: Supplementary file 1 [file downloadSupplementary]

Table SI. Primers used to amplify the OTS.

| Name | Forward primer (5'-3')  | Reverse primer (5'-3')    | Size (bp) | sgRNA    |
|------|-------------------------|---------------------------|-----------|----------|
| OT1  | GGACTTGGATCACTATGTCCCT  | GCCCTACTGCTCACATTTGG      | 261       | sgRNA1-1 |
| OT2  | CACCCCAGGTATTTTCCCCTT   | TCCCCTCTTGCCCAGAAAAA      | 292       | sgRNA1-2 |
| OT3  | AATCCCTGTTGCTGGTGAGG    | CAACGGCATATTCTCCCCCA      | 183       | sgRNA1-2 |
| OT4  | TCAAAGGAACTGACTTTCAGACT | TTTTGTGACCCACGTCTTAACAT   | 209       | sgRNA1-2 |
| OT5  | CTGTGTATTGCAAGAGTGGCAT  | AGGGGAGAGGAGAGCAAATCT     | 152       | sgRNA2-1 |
| OT6  | TTAGCAATAGGAGCCACCGC    | GCTGGGTTTGGTGGTGAC        | 210       | sgRNA2-1 |
| OT7  | AAACAGCAGTCCATATAGCCGT  | TTTTCCCCCTTTCGAACACTGAT   | 131       | sgRNA2-1 |
| OT8  | GCTTCCCCCACTATAACCAAC   | ATGGGTTCTGTCCAGGCTCA      | 172       | sgRNA2-2 |
| OT9  | GGCACAGGTTTCTTGGAGGA    | GGTTCGGGCCACAAAGAGTA      | 213       | sgRNA2-3 |
| OT10 | GGATGTAACATGCACCCAGG    | TCAAAGGTCAAATAGTCCCCAAAAG | 147       | sgRNA2-3 |
| OT11 | GAACCGTTTACTCGGGTGGA    | GCTTCCCCTCAGGACTCATC      | 195       | sgRNA2-3 |

OTS, OTS, off-target sites.

Table SII. Clinical parameters of the study subjects.

| Parameters      | Group            | N   | <i>BRCAl/2</i> mutation |                     | P-value             |
|-----------------|------------------|-----|-------------------------|---------------------|---------------------|
|                 |                  |     | Positive<br>(n=538)     | Negative<br>(n=234) |                     |
| Age (years)     | ≤60              | 431 | 306                     | 125                 | 0.822               |
|                 | >60              | 341 | 232                     | 109                 |                     |
| Tumor size (cm) | >2               | 521 | 408                     | 113                 | <0.001 <sup>a</sup> |
|                 | ≤2               | 251 | 130                     | 121                 |                     |
| Nodal stage     | pN-              | 261 | 159                     | 102                 | 0.017 <sup>a</sup>  |
|                 | pN+              | 511 | 379                     | 132                 |                     |
| TNBC status     | Not all negative | 324 | 227                     | 107                 | 0.006 <sup>a</sup>  |
|                 | Negative         | 438 | 311                     | 127                 |                     |
| Clinical stage  | I-II             | 224 | 127                     | 97                  | 0.012 <sup>a</sup>  |
|                 | III-IV           | 548 | 411                     | 137                 |                     |

Triple-negative breast cancer (TNBC) status indicates the status of ER, PR and HER2. <sup>a</sup>Statistically significant at P<0.05.
